# Supplementary material for: Disease-associated DNA2 nuclease–helicase protects cells from lethal chromosome under-replication
Source: PubMed Central journal article supplement (PMC7367196; doi:10.1093/nar/gkaa524), 2020-06-16
Supplement: gkaa524_supplemental_file.pdf [file gkaa524_supplemental_file.pdf]

**Supplementary Table S1.** List of *Saccharomyces cerevisiae* strains used in this study.

| Strain      | Relevant genotype                                                                | Source        |
|-------------|----------------------------------------------------------------------------------|---------------|
| YRL19       | <i>Mata, hisΔ3, leu2Δ0, met15Δ0, ura3Δ0 (BY4741)</i>                             | GE Healthcare |
| CloneID 174 | <i>YRL19, yen1::KAN</i>                                                          | GE Healthcare |
| YRL300      | <i>YRL19, pif1::pif1-m2</i>                                                      | This study    |
| YRL301      | <i>YRL19, pif1::pif1-m2, yen1::KAN</i>                                           | This study    |
| YRL29       | <i>YRL19, dna2::dna2-HD</i>                                                      | (1)           |
| YRL302      | <i>YRL19, dna2::dna2-HD, pif1::pif1-m2</i>                                       | This study    |
| YRL97       | <i>YRL19, dna2::dna2-HD, yen1::KAN</i>                                           | (1)           |
| YRL303      | <i>YRL19, dna2::dna2-HD, pif1::pif1-m2, yen1::KAN</i>                            | This study    |
| YRL304      | <i>YRL19, pif1::pif1-m2, pYES-DEST52 PIF1</i>                                    | This study    |
| YRL305      | <i>YRL19, pif1::pif1-m2, pYES-DEST52 pif1-HD</i>                                 | This study    |
| YRL306      | <i>YRL19, pif1::pif1-m2, pYES-DEST52 ccdB</i>                                    | This study    |
| YRL307      | <i>YRL19, dna2::dna2-HD, pif1::pif1-m2, pYES-DEST52 PIF1</i>                     | This study    |
| YRL308      | <i>YRL19, dna2::dna2-HD, pif1::pif1-m2, pYES-DEST52 pif1-HD</i>                  | This study    |
| YRL309      | <i>YRL19, dna2::dna2-HD, pif1::pif1-m2, pYES-DEST52 ccdB</i>                     | This study    |
| YRL310      | <i>YRL19, dna2::HIS, pif1::pif1-m2</i>                                           | This study    |
| YRL311      | <i>YRL19, dna2::HIS, pif1::pif1-m2, rad9::KAN</i>                                | This study    |
| YRL316      | <i>YRL19, dna2::HIS, pif1::pif1-m2, pAG416 GPD YEN1</i>                          | This study    |
| YRL317      | <i>YRL19, dna2::HIS, pif1::pif1-m2, mus81::NAT, pAG416 GPD YEN1</i>              | This study    |
| YRL318      | <i>YRL19, dna2::HIS, pif1::pif1-m2, yen1::NAT, pAG416 GPD YEN1</i>               | This study    |
| YRL325      | <i>YRL19, rad9::KAN</i>                                                          | This study    |
| YRL326      | <i>YRL19, dna2::HIS, rad9::KAN</i>                                               | This study    |
| YRL327      | <i>YRL19, dna2::HIS, rad9::KAN, pAG416 YEN1</i>                                  | This study    |
| YRL328      | <i>YRL19, dna2::HIS, rad9::KAN, yen1::NAT, pAG416 GPD YEN1</i>                   | This study    |
| YRL330      | <i>YRL19, dna2::dna2-ND/HD, pif1::pif1-m2</i>                                    | This study    |
| YRL334      | <i>YRL19, pif1::pif1-R3E</i>                                                     | This study    |
| YRL335      | <i>YRL19, dna2::dna2-HD, pif1::pif1-R3E</i>                                      | This study    |
| YRL378      | <i>YRL19, pif1::pif1-m2, rad9::KAN</i>                                           | This study    |
| YRL382      | <i>YRL19, pif1::pif1-m2, pAG415 GPD YEN1-EGFP</i>                                | This study    |
| YRL383      | <i>YRL19, dna2::HIS, pif1::pif1-m2, pAG415 GPD YEN1-EGFP</i>                     | This study    |
| YRL386      | <i>YRL19, pif1::pif1-m2, pAG415 GPD YEN1-EGFP, pWJ1322 NOP1-dsRED</i>            | This study    |
| YRL387      | <i>YRL19, dna2::HIS, pif1::pif1-m2, pAG415 GPD YEN1-EGFP, pWJ1322 NOP1-dsRED</i> | This study    |
| YRL405      | <i>YRL19, pif1::HIS</i>                                                          | This study    |
| YRL408B     | <i>YRL19, dna2::NAT, pif1::HIS</i>                                               | This study    |
| YRL411B     | <i>YRL19, pif1::pif1-m2 pYES-DEST YEN1<sup>ON</sup></i>                          | This study    |
| YRL412B     | <i>YRL19, dna2::HIS pif1::pif1-m2 pYES-DEST YEN1<sup>ON</sup></i>                | This study    |
| YRL439B     | <i>YRL19, dna2::dna2-HD, pif1::pif1-4a</i>                                       | This study    |
| YRL442B     | <i>YRL19, dna2::dna2-HD, pif1::pif1-4a yen1::HIS</i>                             | This study    |
| YRL444B     | <i>YRL19, dna2::HIS, mus81::NAT, pif1::pif1-m2</i>                               | This study    |
| YRL600      | <i>YRL19, pif1::pif1-4a</i>                                                      | This study    |
| YRL601      | <i>YRL19, dna2::NAT, pif1::pif1-4a</i>                                           | This study    |

1. Ölmezer, G., Levikova, M., Klein, D., Falquet, B., Fontana, G.A., Cejka, P. and Rass, U. (2016) Replication intermediates that escape Dna2 activity are processed by Holliday junction resolvase Yen1. *Nat. Commun.*, **7**, 13157.

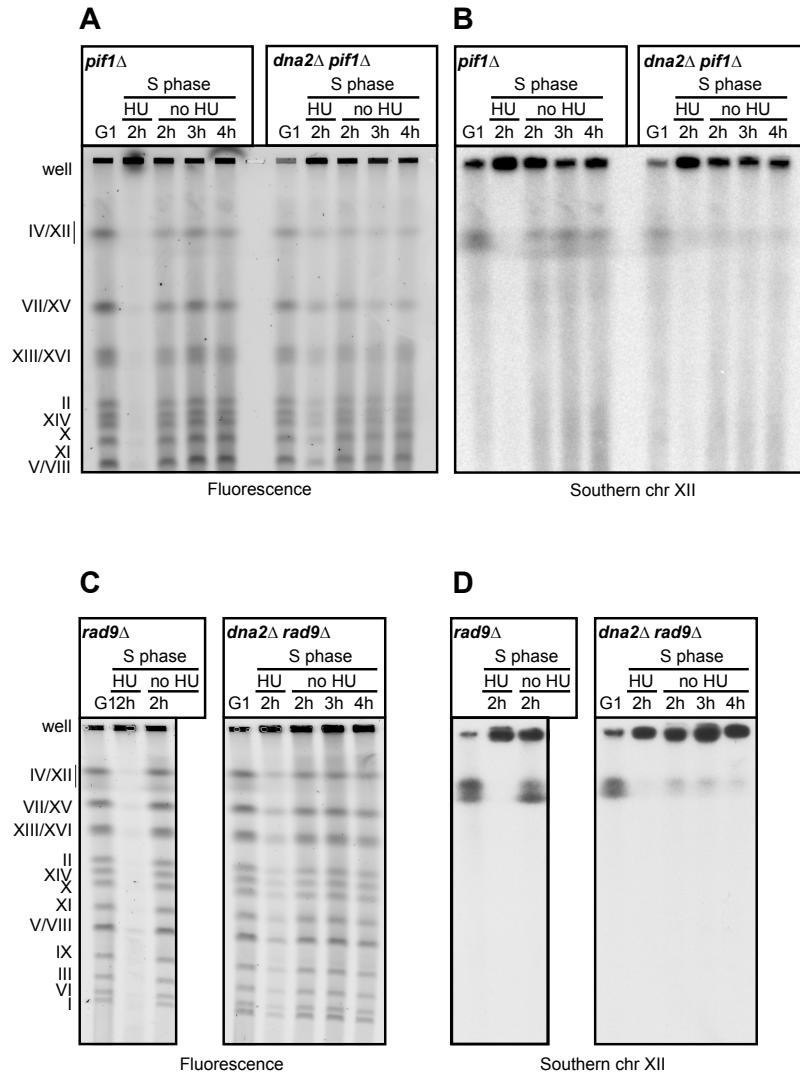

**Figure S1.** Dna2 is essential for replication completion regardless of the presence or absence of Pif1. **(A)** Representative PFGE run of *dna2* $\Delta$  *pif1* $\Delta$  and *pif1* $\Delta$  control samples; DNA stained with ethidium bromide. Gel-resolved DNA is labelled with chromosome numbers. G1-synchronized cells were released into medium containing 200 mM HU for 2 h, followed by drug wash-out and incubation in HU-free medium, which contained nocodazole to prevent mitosis. At the indicated experimental stages, genomic DNA was analysed for fully replicated chromosomes, which can be resolved through PFGE. **(B)** Southern blot analysis of a gel obtained as in panel A, probing for chromosome XII. A distinct shortfall in gel-resolved chromosome XII following transient RS-exposure is detected for the *dna2* $\Delta$  *pif1* $\Delta$  strain. **(C, D)** Representative PFGE run and Southern blot analysis as in panels A and B, respectively, performed with *dna2* $\Delta$  *rad9* $\Delta$  and *rad9* $\Delta$  control samples. A distinct shortfall in gel-resolved chromosome XII following transient RS-exposure is detected for the *dna2* $\Delta$  *rad9* $\Delta$  strain.

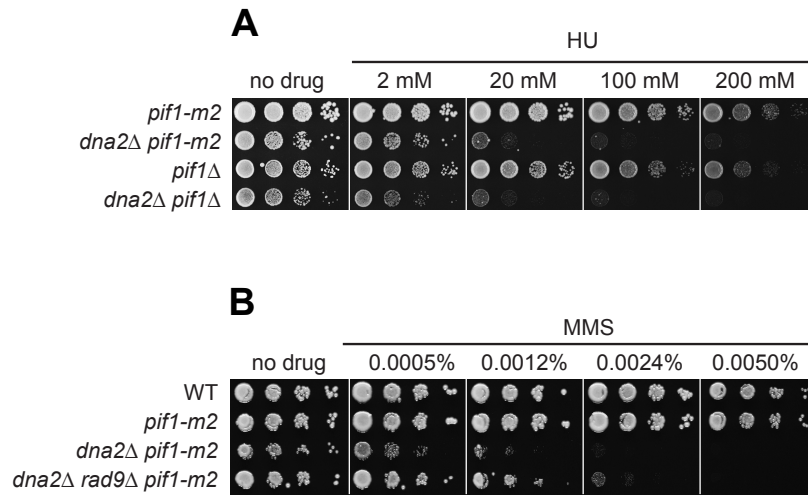

**Figure S2.** *dna2Δ* cells are sensitive to RS independently of Pif1 or Rad9 (**A**) Drop assays of serial dilutions of the indicated *pif1-m2* and *pif1Δ* mutant strains incubated on drug-free and HU-containing medium demonstrate the RS-sensitivity of *dna2Δ* cells, even in complete absence of Pif1. (**B**) Drop assays of serial dilutions of the indicated strains on drug-free and MMS-containing medium demonstrate the sensitivity of *dna2Δ* mutants to RS, even in absence of nuclear Pif1 or Rad9.

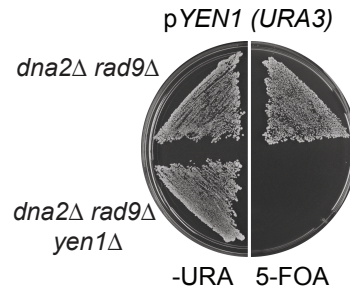

**Figure S3.** *YEN1* is essential in *dna2Δ rad9Δ* cells. Cells contained a Yen1-expressing plasmid (*pYEN1*). Lack of growth on 5-FOA indicates an inviable genotype.



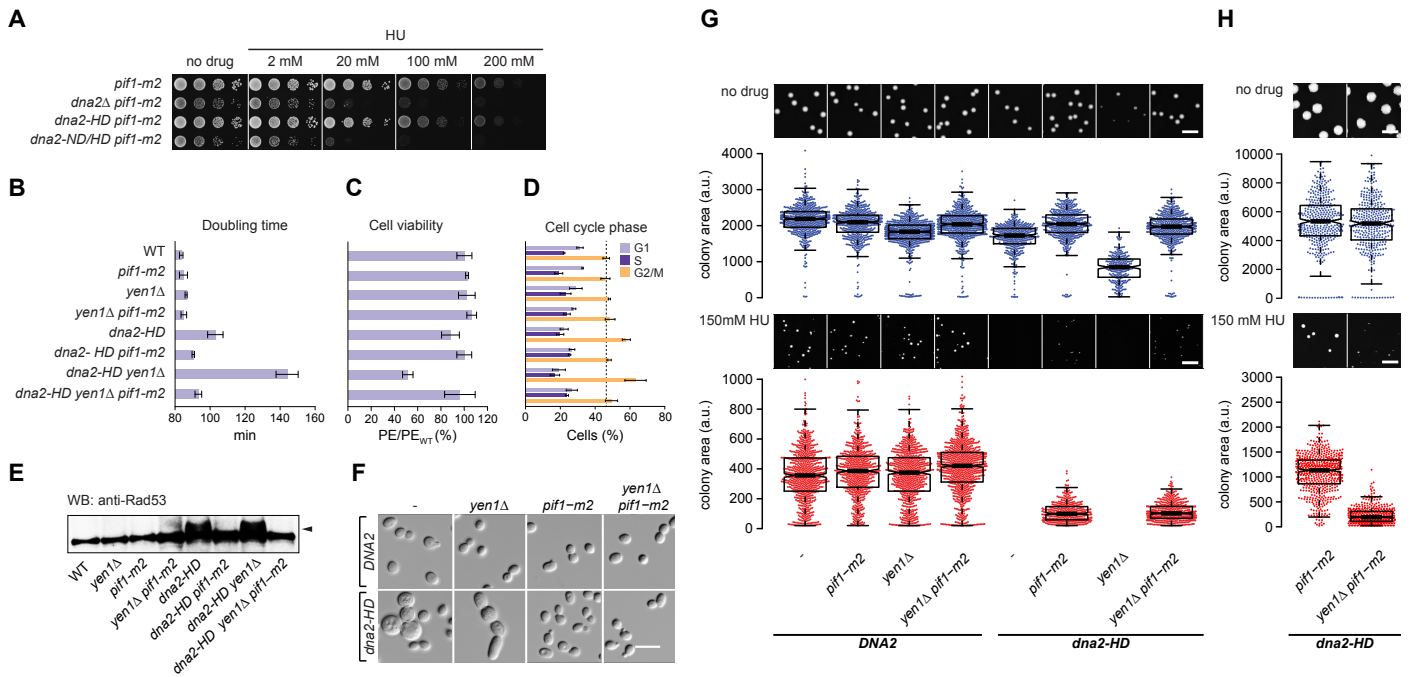

**Figure S4.** The nuclease activity of Dna2 protects Dna2 helicase-defective cells from RS. **(A)** Drop assays of serial dilutions of the indicated strains bearing different mutant alleles of *DNA2* in a *pif1-m2* background. *dna2-HD*, Dna2 R1253Q; *dna2-ND/HD*, nuclease/helicase-dead Dna2 with mutations D657A and R1253Q. **(B)** Doubling time measurements of the indicated strains presented as mean values  $\pm$  SD ( $n = 3$  independent experiments). **(C)** Cell viability of the indicated strains, assessed by plating efficiency (PE). Data represent mean values  $\pm$  SD ( $n = 5$  replicates), relative to wild-type (WT). **(D)** Cell-cycle phase distribution of the indicated strains, assessed by microscopic inspection of cell morphology, represented as mean percentage of cells in G1, S, and G2/M  $\pm$  SD ( $n = 3$  independent experiments). **(E)** Depletion of nuclear Pif1 suppresses chronic checkpoint activation in *dna2-HD* cells. Representative anti-Rad53 Western blots from whole-cell extracts of exponentially growing cultures of the indicated strains. Hyperphosphorylation of Rad53 (black arrowhead) indicates checkpoint activation. **(F)** Representative DIC images showing the cell morphologies observed for the indicated strains. Scale bar, 10  $\mu$ m. **(G)** Colony-size measurements of cells grown on medium with or without 150 mM HU for two days, or **(H)** three days, with representative images. Scale bar, 5 mm. Box plots represent individual data points corresponding to single colonies ( $n > 250$ ), median values (black rectangles), and the limits of the first and third quartile (lower and upper limits of the box, respectively).

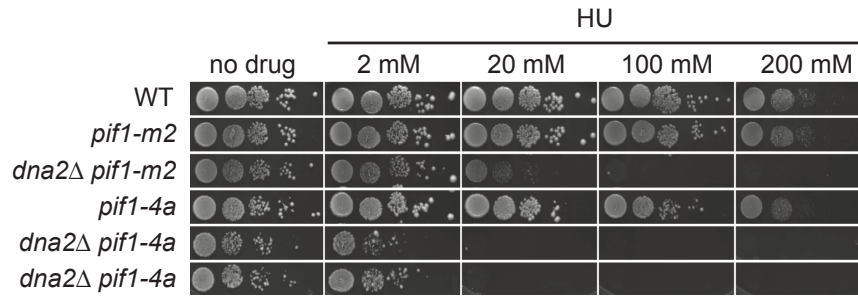

**Figure S5.** Disruption of the stress-responsive TLSSAES phosphorylation motif in Pif1 suppresses the lethality associated with loss of *DNA2*. Drop assays with the indicated strains on drug-free and HU-containing medium assessing growth and sensitivity to RS in the presence or absence of the *pif1-4a* allele at the endogenous *PIF1* locus in two independently created *dna2Δ pif1-4a* strains.
